# Supplementary material for: Circulating brain-derived neurotrophic factor as a potential biomarker in stroke: a systematic review and meta-analysis
Source: PubMed Central journal article supplement (PMC8919648; doi:10.1186/s12967-022-03312-y), 2022-03-14

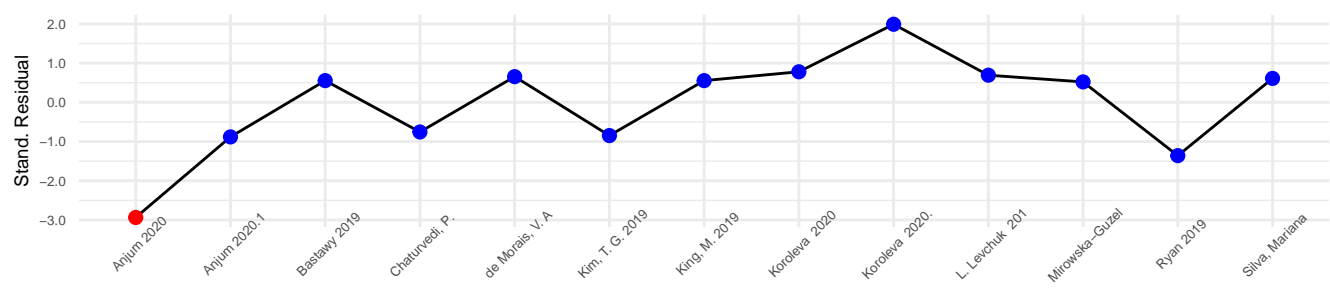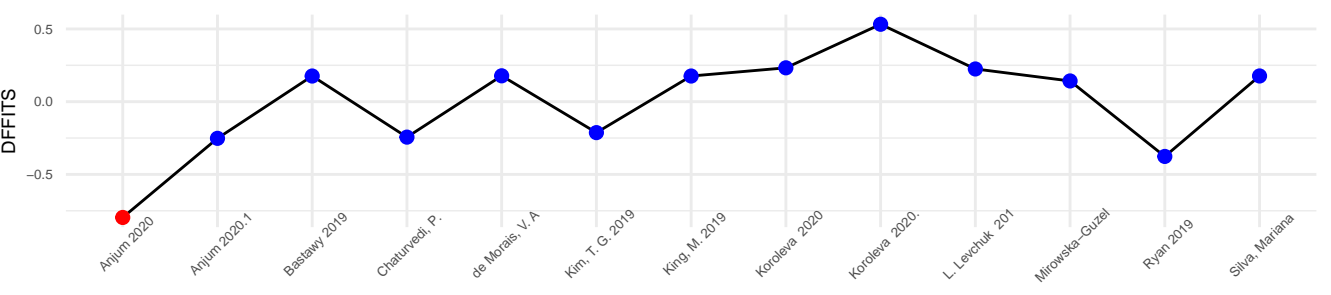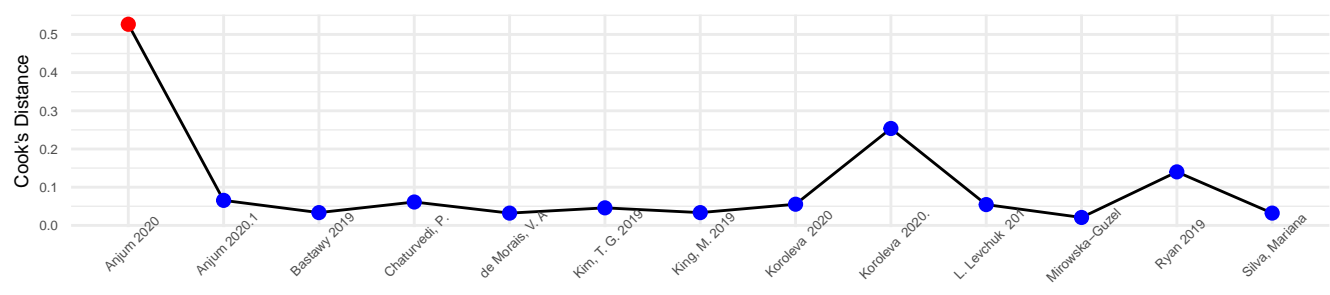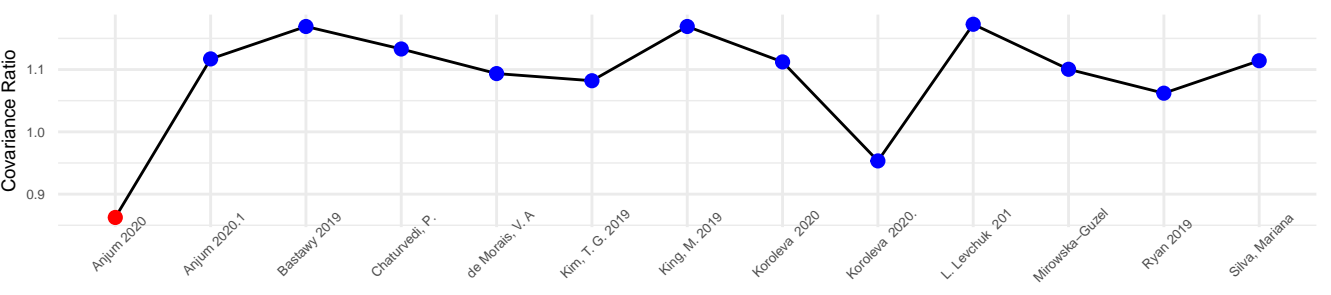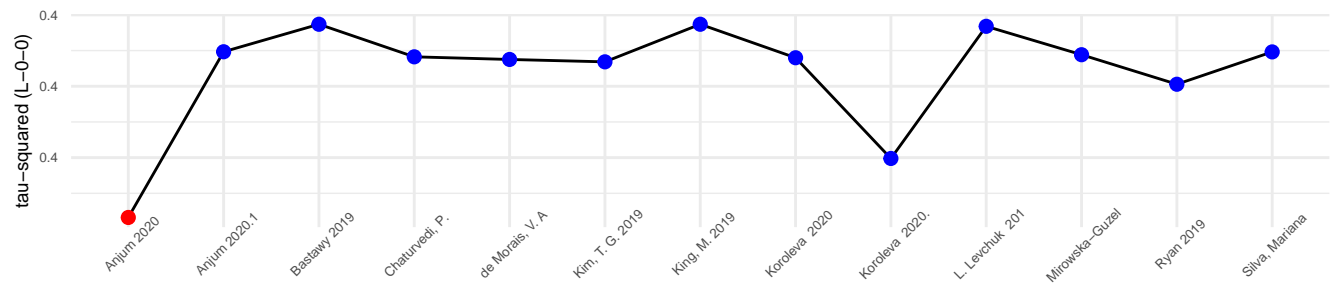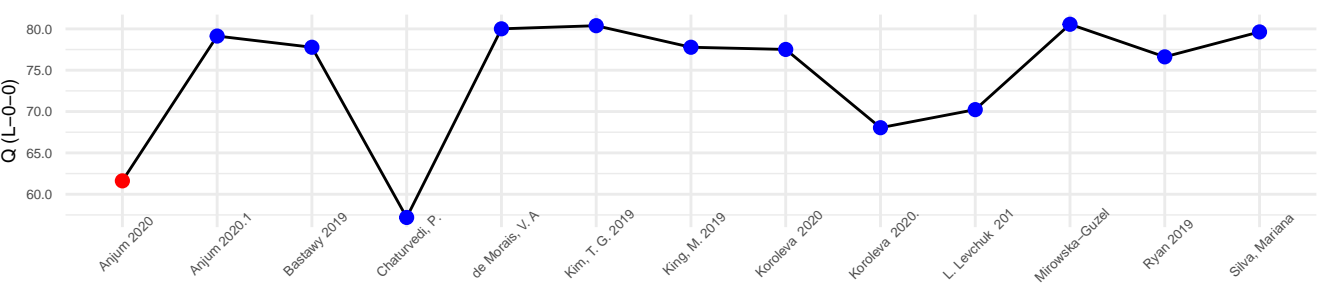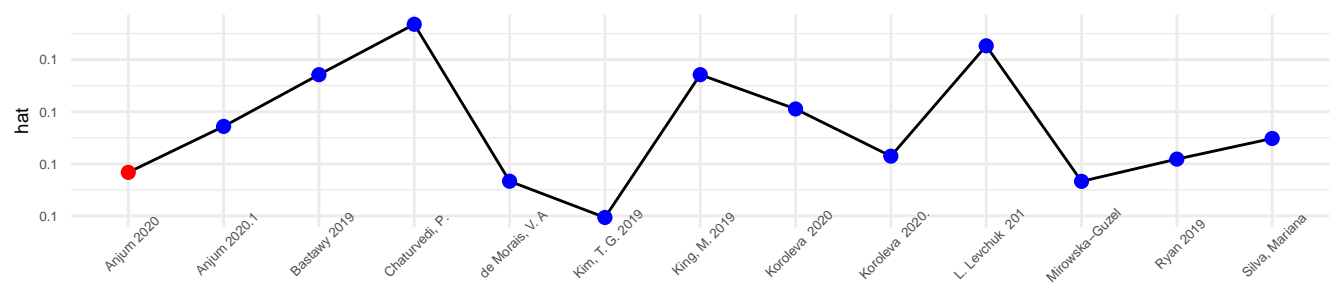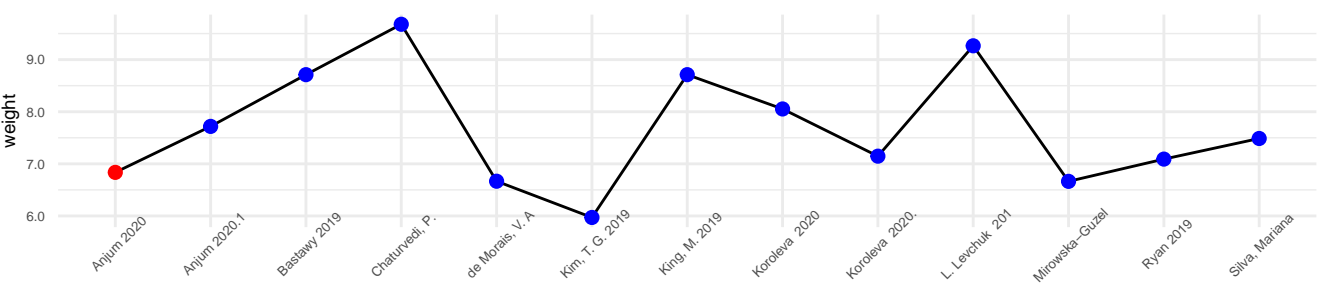

Supplement: 12967_2022_3312_MOESM12_ESM.pdf [file 12967_2022_3312_MOESM12_ESM.pdf]
