# Supplementary material for: Circulating brain-derived neurotrophic factor as a potential biomarker in stroke: a systematic review and meta-analysis
Source: Springer Nature journal article supplement (doi:10.1186/s12967-022-03312-y), 2022-03-14

| Source                                                         | SMD (95% CI)        |
|----------------------------------------------------------------|---------------------|
| Pedarci 2018                                                   | -0.22 [-0.66; 0.22] |
| Hutanu, A. 2020                                                | 0.02 [-0.24; 0.28]  |
| Di Lazzaro 2007                                                | 0.05 [-0.83; 0.93]  |
| Rodier, M. 2015                                                | 0.97 [ 0.49; 1.44]  |
| Total                                                          | 0.20 [-0.31; 0.72]  |
| Prediction interval                                            | [-2.05; 2.46]       |
| Heterogeneity: $\chi^2_3 = 15.06$ ( $P = .002$ ), $I^2 = 80\%$ |                     |

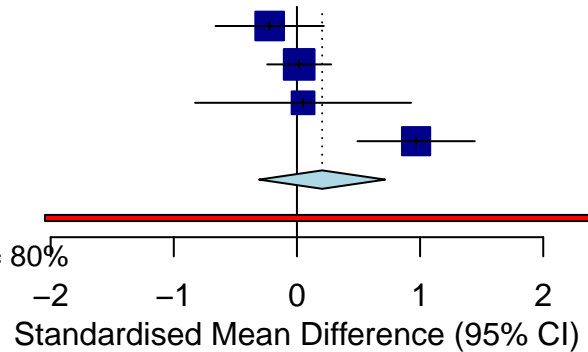

Supplement: MOESM2 [file 20217552]
