# Supplementary material for: Circulating brain-derived neurotrophic factor as a potential biomarker in stroke: a systematic review and meta-analysis
Source: Springer Nature journal article supplement (doi:10.1186/s12967-022-03312-y), 2022-03-14

| Source                                                       | SMD (95% CI)         |
|--------------------------------------------------------------|----------------------|
| Rodier, M. 2015                                              | -1.11 [-1.60; -0.63] |
| Di Lazzaro 2007                                              | -0.09 [-0.97; 0.79]  |
| Hutanu, A. 2020                                              | 0.26 [ 0.00; 0.52]   |
| Total                                                        | -0.31 [-1.29; 0.67]  |
| Prediction interval                                          | [-12.44; 11.81]      |
| Heterogeneity: $\chi^2 = 23.89$ ( $P < .001$ ), $I^2 = 92\%$ |                      |

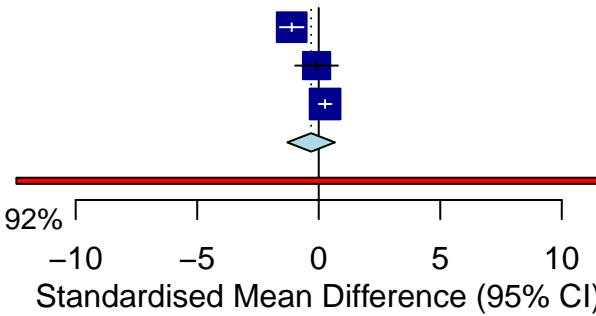

Supplement: MOESM3 [file 20217552]
