# Supplementary material for: Circulating brain-derived neurotrophic factor as a potential biomarker in stroke: a systematic review and meta-analysis
Source: Springer Nature journal article supplement (doi:10.1186/s12967-022-03312-y), 2022-03-14

| Source                                                            | SMD (95% CI)         |
|-------------------------------------------------------------------|----------------------|
| Chan, A. 2015                                                     | -0.98 [-1.32; -0.64] |
| Roslavtceva 2020                                                  | -0.45 [-0.87; -0.04] |
| Sobrinho 2020                                                     | -0.28 [-0.40; -0.15] |
| Zhou 2011                                                         | -0.27 [-0.56; 0.02]  |
| Bembenek, J. P. 2020                                              | -0.11 [-0.47; 0.24]  |
| Bembenek, J. P. 2020                                              | -0.06 [-0.42; 0.30]  |
| Bintang2020                                                       | 0.05 [-0.71; 0.82]   |
| Lopez-Cancio, E. 2017                                             | 0.11 [-0.19; 0.42]   |
| Lu 2015                                                           | 0.56 [-0.06; 1.18]   |
| Rodier, M. 2015                                                   | 0.61 [ 0.15; 1.07]   |
| Wang 2021                                                         | 0.62 [ 0.22; 1.03]   |
| Total                                                             | -0.05 [-0.30; 0.20]  |
| Prediction interval                                               | [-0.94; 0.84]        |
| Heterogeneity: $\chi^2_{10} = 62.38$ ( $P < .001$ ), $I^2 = 84\%$ |                      |

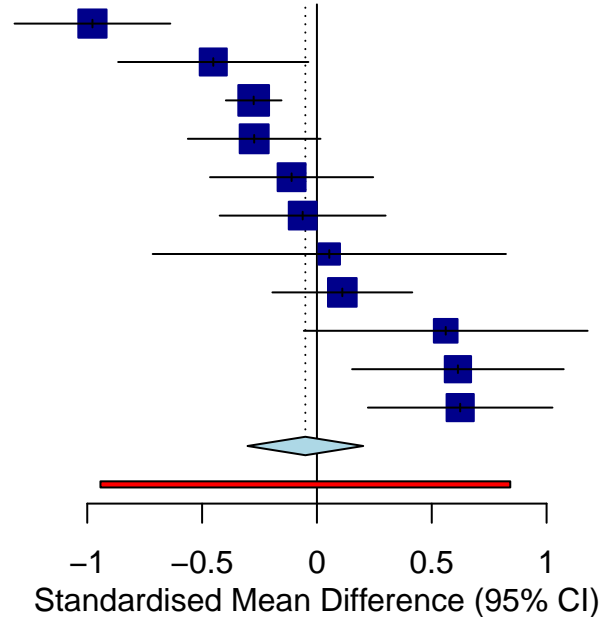

Supplement: MOESM4 [file 20217552]
