# Supplementary material for: Circulating brain-derived neurotrophic factor as a potential biomarker in stroke: a systematic review and meta-analysis
Source: Springer Nature journal article supplement (doi:10.1186/s12967-022-03312-y), 2022-03-14

| Source                                                             | SMD (95% CI)         |
|--------------------------------------------------------------------|----------------------|
| Chan, A. 2015                                                      | -0.57 [-0.90; -0.24] |
| Billinger, S. A. 2018                                              | -0.47 [-1.26; 0.31]  |
| Yang 2011                                                          | -0.47 [-0.75; -0.19] |
| Sobrino 2020                                                       | -0.28 [-0.40; -0.16] |
| Ortega 2019                                                        | -0.26 [-0.47; -0.05] |
| Roslavtceva 2020                                                   | -0.19 [-0.60; 0.22]  |
| Rodier, M. 2015                                                    | -0.15 [-0.60; 0.30]  |
| Lopez-Cancio, E. 2017                                              | -0.11 [-0.42; 0.19]  |
| Mourao 2019                                                        | -0.09 [-0.48; 0.30]  |
| Di Lazzaro 2007                                                    | -0.05 [-0.93; 0.82]  |
| Lu 2015                                                            | 0.19 [-0.41; 0.80]   |
| Hutanu, A. 2020                                                    | 0.28 [ 0.01; 0.54]   |
| Asadollahi, M. 2019                                                | 0.31 [-0.41; 1.03]   |
| Zhang 2017                                                         | 2.83 [ 2.38; 3.28]   |
| Total                                                              | 0.06 [-0.28; 0.40]   |
| Prediction interval                                                | [-1.30; 1.42]        |
| Heterogeneity: $\chi^2_{13} = 198.17$ ( $P < .001$ ), $I^2 = 93\%$ |                      |

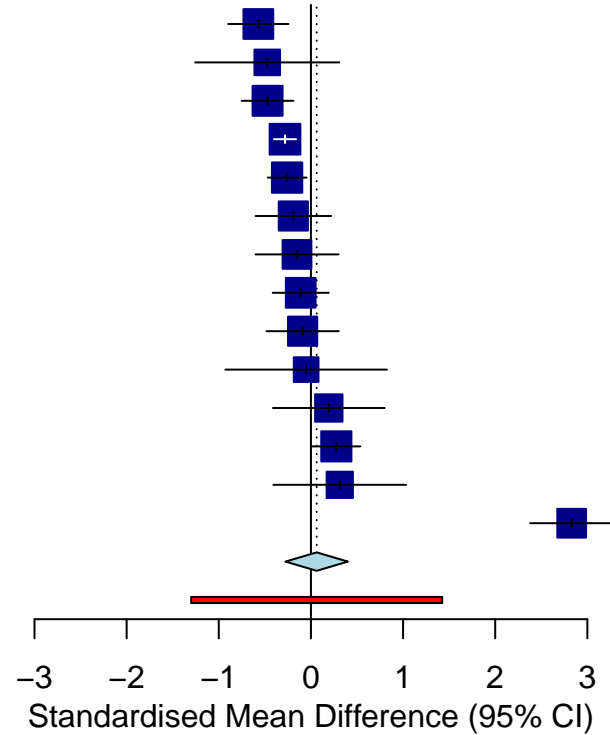

Supplement: MOESM5 [file 20217552]
