# Supplementary material for: Circulating brain-derived neurotrophic factor as a potential biomarker in stroke: a systematic review and meta-analysis
Source: Springer Nature journal article supplement (doi:10.1186/s12967-022-03312-y), 2022-03-14

| Source                                                         | SMD (95% CI)         |
|----------------------------------------------------------------|----------------------|
| Chan, A. 2015                                                  | -0.48 [-0.81; -0.16] |
| Roslavtceva 2020                                               | -0.29 [-0.70; 0.13]  |
| Sobrino 2020                                                   | -0.01 [-0.14; 0.11]  |
| Prodjohardjono 2020                                            | 0.02 [-0.32; 0.35]   |
| Lopez-Cancio, E. 2017                                          | 0.22 [-0.08; 0.53]   |
| Lu 2015                                                        | 0.30 [-0.31; 0.91]   |
| Rodier, M. 2015                                                | 0.76 [ 0.30; 1.23]   |
| Total                                                          | 0.04 [-0.20; 0.28]   |
| Prediction interval                                            | [-0.71; 0.79]        |
| Heterogeneity: $\chi^2_6 = 23.58$ ( $P < .001$ ), $I^2 = 75\%$ |                      |

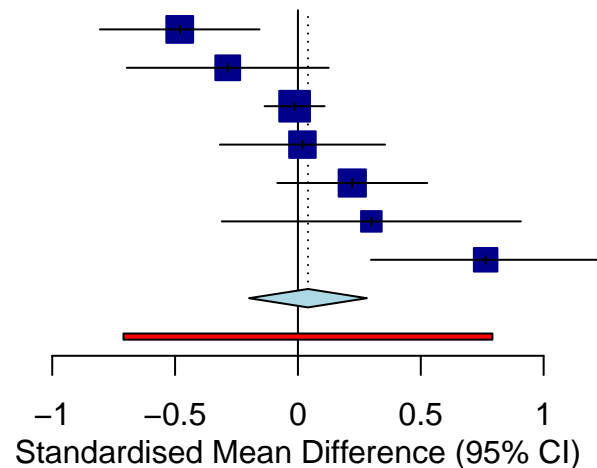

Supplement: MOESM6 [file 20217552]
