# Supplementary material for: Circulating brain-derived neurotrophic factor as a potential biomarker in stroke: a systematic review and meta-analysis
Source: Springer Nature journal article supplement (doi:10.1186/s12967-022-03312-y), 2022-03-14

# Sorted by Effect Size

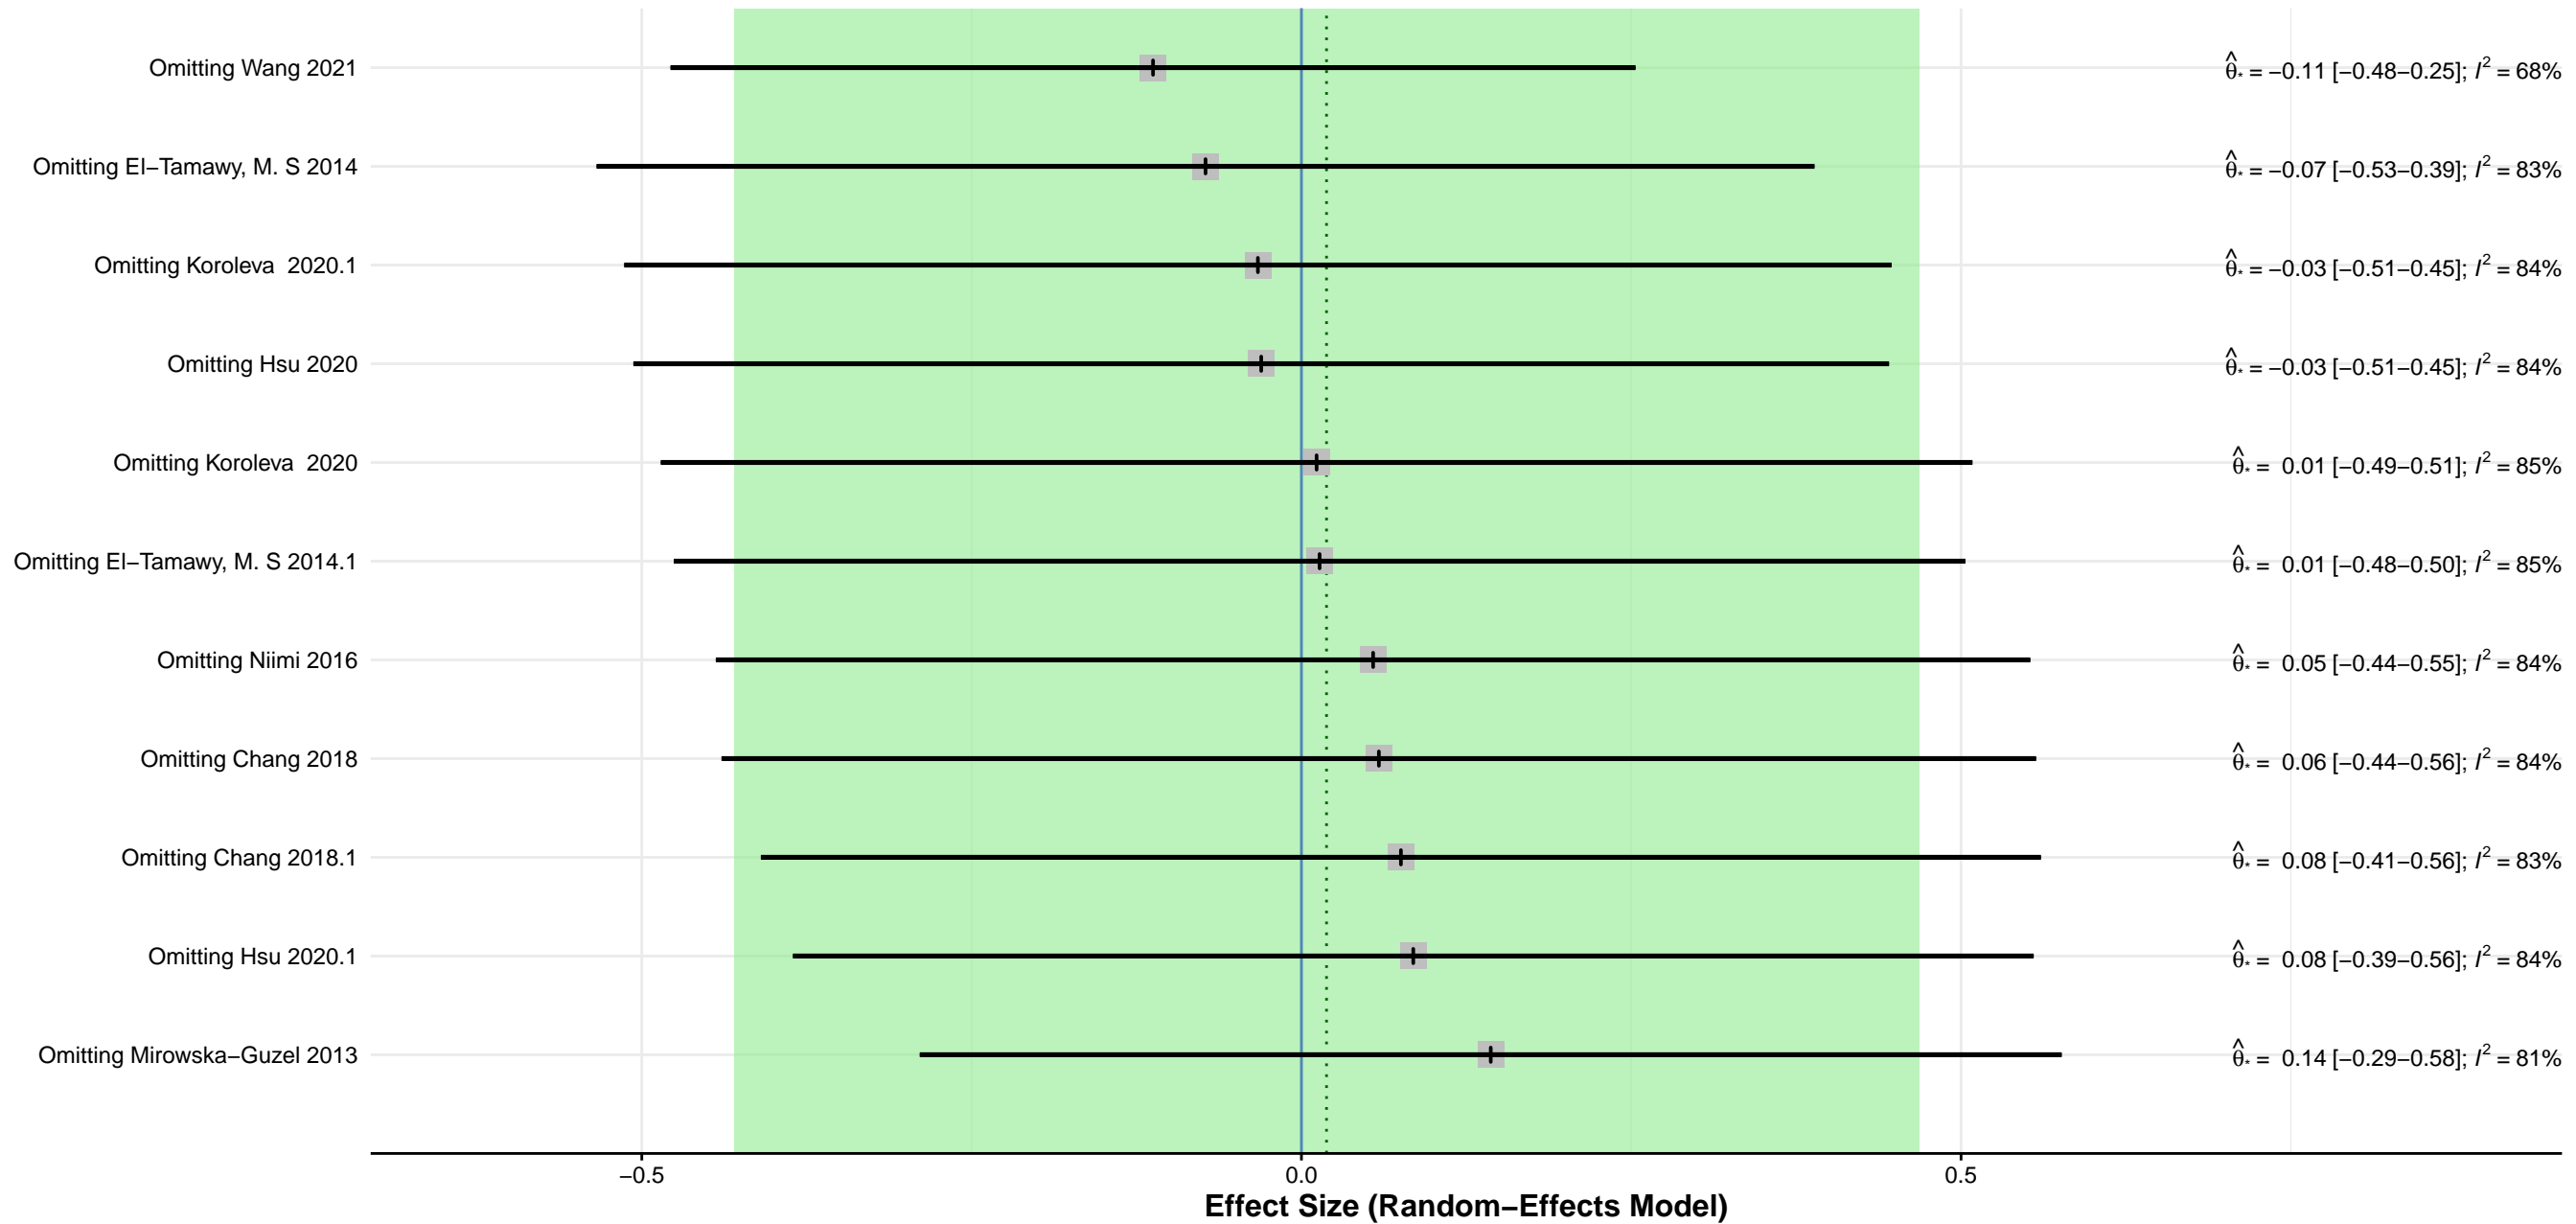

Supplement: MOESM15 [file 20217552]
